# Supplementary material
Source: Research Square preprint supplement (doi:10.21203/rs.3.rs-9501125/v1)
Supplement: Supplementary file 1 [file 955bddd19f90a9cb5d0a1ad8.xlsx]

## Sheet: panel
no	provinceno	year	h_gini	c_gini	new_urban	abstauk	abstaul	gender	illiteracy	health_facilities	health_spending	pgdp	temperature	precipitation	pm	region	nu	nu_iv	地区	地区	dìqū	#NAME?
1100002010	110000	2010	0.112356	0.0531357	12.1	0.093653	1.44914	1.03496	0.0220207	47.9664	0.0952192	7.62691	9.65908	41.3713	70.3941	east	0.86	0.8596	北京	北京	běijīng	#NAME?
1100002012	110000	2012	0.203725	0.092465	13.18	0.21167	1.16961	1.04576	0.0146345	46.3523	0.123224	9.15529	9.88939	45.2936	63.2544	east	0.863	0.862	北京	北京	běijīng	#NAME?
1100002014	110000	2014	0.198157	0.118514	16.58	0.385183	1.04892	1.00743	0.0147953	44.3943	0.148452	10.5601	11.3934	35.0521	68.7757	east	0.865	0.864	北京	北京	běijīng	#NAME?
1100002016	110000	2016	0.185311	0.0653545	24.03	0.541008	0.907032	1.04946	0.0155941	44.5239	0.181298	12.3195	10.8577	60.5118	53.7771	east	0.868	0.865	北京	北京	běijīng	#NAME?
1100002018	110000	2018	0.18288	0.0685836	32.48	0.664872	0.858627	0.973556	0.0169384	45.885	0.223581	15.1031	10.8124	45.9695	40.4818	east	0.871	0.865	北京	北京	běijīng	#NAME?
1100002020	110000	2020	0.176515	0.0701652	35.41	0.802894	0.742371	1.02536	0.011896	48.4194	0.276674	16.42	11.0037	44.2641	32.5149	east	0.875	0.8755	北京	北京	běijīng	#NAME?
1200002010	120000	2010	0.0945087	0.0819777	2.48	0.049871	2.08419	0.991536	0.0273224	34.9654	0.0539415	5.25851	11.8666	42.6018	75.1006	east	0.796	0.7957	天津	天津	tiānjīn	#NAME?
1200002012	120000	2012	0.205195	0.0795931	5.18	0.017476	1.16363	0.968602	0.0223866	33.0261	0.0768578	6.56241	12.1519	57.1756	73.4804	east	0.836	0.8156	天津	天津	tiānjīn	#NAME?
1200002014	120000	2014	0.208413	0.0681482	9.68	0.0374892	1.09266	0.985597	0.0235515	34.9195	0.112897	7.44619	13.5879	36.0491	85.5124	east	0.873	0.8227	天津	天津	tiānjīn	#NAME?
1200002016	120000	2016	0.237903	0.0819859	12.69	0.0698865	1.08612	1.14981	0.0225396	37.72	0.140839	7.95371	13.2271	63.689	68.0772	east	0.898	0.8291	天津	天津	tiānjīn	#NAME?
1200002018	120000	2018	0.21056	0.0803918	20.58	0.0746903	0.959138	1.1583	0.0138502	41.1135	0.139378	9.66226	13.1235	51.9953	52.6554	east	0.938	0.8315	天津	天津	tiānjīn	#NAME?
1200002020	120000	2020	0.205222	0.0479705	16.44	0.0927692	1.56527	1.13077	0.0168769	42.0908	0.126525	10.0995	13.362	45.8677	48.1631	east	0.847	0.847	天津	天津	tiānjīn	#NAME?
1300002010	130000	2010	0.119897	0.0706045	7.14	0.244695	0.158212	1.02989	0.0428988	113.154	0.0327328	2.50259	8.99859	41.8099	58.5907	east	0.439	0.373327	河北	河北	héběi	#NAME?
1300002012	130000	2012	0.218657	0.0643198	3.47	0.255896	0.146472	1.02168	0.0376591	108.949	0.0445015	3.17784	8.88611	45.0141	58.8278	east	0.466	0.405291	河北	河北	héběi	#NAME?
1300002014	130000	2014	0.211296	0.0786179	2.52	0.272938	0.142449	1.0152	0.0313975	107.736	0.0610119	3.44243	10.5107	34.1262	66.702	east	0.494	0.429018	河北	河北	héběi	#NAME?
1300002016	130000	2016	0.228693	0.0690751	1.86	0.281793	0.135574	1.01966	0.0409842	106.841	0.0742861	3.86089	9.98506	53.2112	53.5678	east	0.539	0.537364	河北	河北	héběi	#NAME?
1300002018	130000	2018	0.227477	0.0691151	2.66	0.28468	0.116283	0.989043	0.0395118	114.581	0.0930959	4.37579	10.1204	42.4028	42.6943	east	0.573	0.566418	河北	河北	héběi	#NAME?
1300002020	130000	2020	0.209961	0.0595206	5.04	0.27168	0.112769	0.985529	0.0224558	116.478	0.109495	4.825	10.1413	44.7145	36.5723	east	0.601	0.599836	河北	河北	héběi	#NAME?
1400002010	140000	2010	0.117373	0.0554254	9.34	0.307932	0.15099	1.03806	0.0348312	114.992	0.0318579	2.4913	8.71673	41.3118	49.6615	mid	0.481	0.486227	山西	山西	shānxī	#NAME?
1400002012	140000	2012	0.205244	0.0475893	3.08	0.333263	0.152354	1.03755	0.0233108	113.281	0.0508286	3.29287	8.05206	43.5803	51.2987	mid	0.513	0.518209	山西	山西	shānxī	#NAME?
1400002014	140000	2014	0.207423	0.0667413	2.06	0.385882	0.17698	1.024	0.0289437	115.581	0.069144	3.4282	9.12989	42.5117	46.0645	mid	0.543	0.543145	山西	山西	shānxī	#NAME?
1400002016	140000	2016	0.224012	0.0836181	1.25	0.436046	0.233286	1.04718	0.0252265	120.102	0.0856175	3.39966	9.22279	50.6065	43.4381	mid	0.573	0.566855	山西	山西	shānxī	#NAME?
1400002018	140000	2018	0.222732	0.0710547	0.56	0.291871	0.220339	1.03432	0.0247201	120.157	0.10251	4.55685	9.29935	40.2646	39.1349	mid	0.599	0.588045	山西	山西	shānxī	#NAME?
1400002020	140000	2020	0.208524	0.0721428	2.86	0.159179	0.215638	1.02974	0.0182165	117.88	0.124226	5.11049	9.23146	49.2722	34.1132	mid	0.625	0.623154	山西	山西	shānxī	#NAME?
1500002010	150000	2010	0.337591	1.37619	8.38	0.167376	0.257736	1.01139	0.0593838	91.2824	0.048835	3.31711	4.14839	23.4744	28.7513	west	0.555	0.570144	内蒙古	内蒙古	nèiměnggǔ	#NAME?
1500002012	150000	2012	0.27175	0.42836	5.82	0.161819	0.327193	1.04187	0.0401185	93.5308	0.0722037	4.24923	3.54302	29.597	25.8153	west	0.584	0.599867	内蒙古	内蒙古	nèiměnggǔ	#NAME?
1500002014	150000	2014	0.21875	0.133333	8.05	0.193299	0.349857	1.03045	0.0465585	95.6554	0.0930094	4.96456	5.36817	22.1861	28.6504	west	0.61	0.609933	内蒙古	内蒙古	nèiměnggǔ	#NAME?
1500002016	150000	2016	0.176087	0.041502	9.45	0.109159	0.374543	1.01917	0.0466063	98.5304	0.116843	5.66063	4.82365	26.5793	26.2647	west	0.634	0.616589	内蒙古	内蒙古	nèiměnggǔ	#NAME?
1500002018	150000	2018	0.236808	0.0631929	8.61	0.0244449	0.330115	1.03788	0.0457748	101.61	0.130314	6.66424	5.10349	29.0394	24.1138	west	0.655	0.6449	内蒙古	内蒙古	nèiměnggǔ	#NAME?
1500002020	150000	2020	0.160714	0.0962205	11.99	0.0918786	0.307659	1.04712	0.0387724	102.16	0.156076	7.18186	5.43497	28.2839	20.9916	west	0.675	0.705267	内蒙古	内蒙古	nèiměnggǔ	#NAME?
2100002010	210000	2010	0.119461	0.0593141	12.1	0.190331	0.65124	1.00125	0.0274867	79.5543	0.0345966	3.1763	7.074	76.0013	38.7906	east	0.621	0.5606	辽宁	辽宁	liáoníng	#NAME?
2100002012	210000	2012	0.236815	0.0507216	6.8	0.217238	0.58424	1.00446	0.022426	81.8103	0.0457577	4.07968	7.08466	71.5475	42.0282	east	0.659	0.520886	辽宁	辽宁	liáoníng	#NAME?
2100002014	210000	2014	0.231057	0.0692686	3.86	0.21724	0.471306	1.01887	0.0178066	81.324	0.0627834	4.59516	9.07199	34.1937	48.0401	east	0.676	0.597629	辽宁	辽宁	liáoníng	#NAME?
2100002016	210000	2016	0.241982	0.0628416	4.15	0.0943609	0.414774	1.01593	0.0168767	83.5013	0.0710215	4.71285	8.51331	59.4996	38.9931	east	0.682	0.629214	辽宁	辽宁	liáoníng	#NAME?
2100002018	210000	2018	0.234242	0.0729165	3.69	0.167768	0.378364	0.995774	0.0155374	83.9641	0.0817106	5.47903	8.50145	50.3839	32.5117	east	0.692	0.619214	辽宁	辽宁	liáoníng	#NAME?
2100002020	210000	2020	0.229061	0.0617659	5.03	0.457184	0.316753	0.979286	0.0118872	80.2139	0.0971845	5.87812	8.97117	64.6203	33.2676	east	0.722	0.686864	辽宁	辽宁	liáoníng	#NAME?
2200002010	220000	2010	0.128558	0.0667147	20.22	0.335948	0.0780063	1.03498	0.0284568	70.5679	0.040375	2.33364	3.88278	62.9382	33.2543	mid	0.533	0.454638	吉林	吉林	jílín	#NAME?
2200002012	220000	2012	0.251491	0.0568628	12.89	0.294777	0.0074341	1.02504	0.0184716	73.1431	0.0594366	3.21646	3.72588	64.5437	38.0925	mid	0.545	0.468913	吉林	吉林	jílín	#NAME?
2200002014	220000	2014	0.250947	0.103741	6.32	0.26921	0.0357004	1.03003	0.028838	75.2877	0.0781378	3.77233	5.29631	37.3685	43.4173	mid	0.568	0.469537	吉林	吉林	jílín	#NAME?
2200002016	220000	2016	0.245937	0.0962835	1.96	0.265348	0.0557791	1.01904	0.0247468	81.1414	0.106591	4.06194	4.91786	56.7619	34.4876	mid	0.587	0.504437	吉林	吉林	jílín	#NAME?
2200002018	220000	2018	0.257906	0.081191	2.55	0.258551	0.0510061	1.00619	0.0280234	91.3486	0.113213	4.53052	5.21103	59.1242	26.4584	mid	0.609	0.502	吉林	吉林	jílín	#NAME?
2200002020	220000	2020	0.24426	0.0726932	3.76	0.210071	0.0261047	0.996381	0.0173453	106.778	0.125135	5.1088	5.71892	54.5459	28.1114	mid	0.626	0.599912	吉林	吉林	jílín	#NAME?
2300002010	230000	2010	0.138587	0.0751907	24.85	0.148139	0.030571	1.01116	0.0354579	57.5867	0.0352674	2.16757	1.50419	46.4754	24.5199	mid	0.556	0.543742	黑龙江	黑龙江	hēilóngjiāng	#NAME?
2300002012	230000	2012	0.252326	0.0784163	19.09	0.092007	0.0138571	1.02565	0.0244024	56.8153	0.046544	2.95806	1.43555	53.6683	28.3676	mid	0.569	0.547583	黑龙江	黑龙江	hēilóngjiāng	#NAME?
2300002014	230000	2014	0.256906	0.0969778	14.87	0.0818911	0.0285603	0.992945	0.0273179	58.8387	0.065219	3.37328	2.27566	38.982	33.5562	mid	0.592	0.554967	黑龙江	黑龙江	hēilóngjiāng	#NAME?
2300002016	230000	2016	0.24699	0.0742764	12.78	0.155014	0.086517	1.01532	0.0359609	58.8363	0.0810165	3.43488	1.68969	49.952	26.4057	mid	0.611	0.555175	黑龙江	黑龙江	hēilóngjiāng	#NAME?
2300002018	230000	2018	0.248651	0.079642	15.1	0.198941	0.142022	1.0211	0.0234113	61.1632	0.0904719	3.86129	2.50166	53.3095	22.3776	mid	0.635	0.57835	黑龙江	黑龙江	hēilóngjiāng	#NAME?
2300002020	230000	2020	0.242343	0.0824474	17.8	0.224128	0.185071	1.00744	0.0235177	64.5254	0.126518	4.2994	3.43799	54.2993	21.7116	mid	0.656	0.685167	黑龙江	黑龙江	hēilóngjiāng	#NAME?
3100002010	310000	2010	0.104885	0.0702511	19.61	0.620358	2.61993	1.05225	0.0304691	20.4429	0.069505	7.77916	16.4102	86.3785	45.0964	east	0.893	0.8927	上海	上海	shànghǎi	#NAME?
3100002012	310000	2012	0.219687	0.0902123	21.26	0.957235	1.85073	1.08068	0.022331	20.1959	0.0822593	8.88103	16.2318	94.0388	26.4574	east	0.886	0.8931	上海	上海	shànghǎi	#NAME?
3100002014	310000	2014	0.212158	0.100646	24.07	1.38287	1.29074	1.05363	0.0314514	20.2027	0.107317	10.2431	16.3891	95.6465	49.9421	east	0.881	0.8957	上海	上海	shànghǎi	#NAME?
3100002016	310000	2016	0.219948	0.100279	29.25	1.76235	1.25269	1.05152	0.0310923	20.3324	0.15529	12.1147	17.116	93.997	42.5154	east	0.862	0.8789	上海	上海	shànghǎi	#NAME?
3100002018	310000	2018	0.212801	0.113445	37.94	2.01719	1.21379	1.04683	0.0237697	21.3859	0.189947	14.5502	17.1	86.7637	35.0974	east	0.863	0.88	上海	上海	shànghǎi	#NAME?
3100002020	310000	2020	0.200897	0.106179	42.37	2.13625	1.12253	1.07488	0.0214377	23.7018	0.219076	15.6605	17.2421	98.4122	29.3476	east	0.893	0.893	上海	上海	shànghǎi	#NAME?
3200002010	320000	2010	0.0880824	0.053118	2.65	0.139361	0.452026	0.955877	0.0605592	39.3392	0.0317308	5.25911	15.3436	79.0748	55.0584	east	0.606	0.591077	江苏	江苏	jiāngsū	#NAME?
3200002012	320000	2012	0.221602	0.0535917	3.14	0.139949	0.435391	0.95157	0.047785	38.2389	0.0514951	6.61353	15.27	73.9407	48.9031	east	0.63	0.617362	江苏	江苏	jiāngsū	#NAME?
3200002014	320000	2014	0.22163	0.0781354	5.33	0.173486	0.446976	0.986674	0.0506602	38.6366	0.067737	7.82883	15.4912	83.3985	59.9541	east	0.657	0.640385	江苏	江苏	jiāngsū	#NAME?
3200002016	320000	2016	0.222361	0.0581841	8.66	0.192381	0.444656	0.98721	0.0581508	38.3212	0.0850459	9.22932	15.9746	90.375	49.3749	east	0.689	0.666815	江苏	江苏	jiāngsū	#NAME?
3200002018	320000	2018	0.203928	0.0599954	10.84	0.198296	0.424512	1.01501	0.0576984	39.3725	0.100085	11.0357	15.9676	85.6121	45.489	east	0.712	0.686892	江苏	江苏	jiāngsū	#NAME?
3200002020	320000	2020	0.202602	0.0636645	13.75	0.215646	0.390542	1.01382	0.0374723	42.1694	0.118847	12.1278	16.0461	99.9001	37.8687	east	0.734	0.711715	江苏	江苏	jiāngsū	#NAME?
3300002010	330000	2010	0.0938905	0.0396131	2.56	0.133828	0.420338	0.973056	0.0713821	54.9642	0.0412209	5.03027	16.2823	158.086	37.8216	east	0.616	0.584545	浙江	浙江	zhèjiāng	#NAME?
3300002012	330000	2012	0.195106	0.0541006	3.36	0.174494	0.343552	1.03417	0.0511969	53.2471	0.05381	6.04792	15.9846	158.811	36.0036	east	0.609	0.603273	浙江	浙江	zhèjiāng	#NAME?
3300002014	330000	2014	0.210224	0.0757576	5.52	0.206222	0.315221	1.10258	0.0585411	51.5416	0.0736503	6.79516	16.386	133.981	44.3643	east	0.607	0.622364	浙江	浙江	zhèjiāng	#NAME?
3300002016	330000	2016	0.196642	0.0434602	7.99	0.215868	0.278888	1.07471	0.0599245	51.9532	0.0893347	7.78228	17.094	140.226	33.9376	east	0.617	0.646364	浙江	浙江	zhèjiāng	#NAME?
3300002018	330000	2018	0.204742	0.0479488	12.16	0.225915	0.234322	1.06124	0.0493201	52.2143	0.0998246	9.24642	16.9479	117.768	28.2947	east	0.63	0.667909	浙江	浙江	zhèjiāng	#NAME?
3300002020	330000	2020	0.182314	0.041024	18.48	0.218027	0.160966	1.07791	0.0393228	53.1849	0.129692	10.0014	17.1043	129.816	23.0856	east	0.72	0.693564	浙江	浙江	zhèjiāng	#NAME?
3400002010	340000	2010	0.114388	0.0746364	8.4	0.264383	0.386705	0.997489	0.109572	38.605	0.030925	2.22424	15.7506	106.613	53.3102	mid	0.43	0.484187	安徽	安徽	ānhuī	#NAME?
3400002012	340000	2012	0.231079	0.0577569	2.38	0.269048	0.386443	1.05057	0.0827325	38.9344	0.0534276	3.0682	15.601	93.3277	49.2595	mid	0.466	0.4985	安徽	安徽	ānhuī	#NAME?
3400002014	340000	2014	0.237174	0.0693225	2.12	0.285577	0.383826	0.941049	0.072288	41.394	0.0708688	3.75516	15.8418	100.334	56.5941	mid	0.499	0.524625	安徽	安徽	ānhuī	#NAME?
3400002016	340000	2016	0.243018	0.090659	3.02	0.297378	0.381134	1.02319	0.0680908	40.4194	0.0795823	4.36063	16.3092	115.792	45.6803	mid	0.534	0.530119	安徽	安徽	ānhuī	#NAME?
3400002018	340000	2018	0.21644	0.0960004	5.22	0.307401	0.373448	1.03213	0.0674948	41.0221	0.103209	5.59758	16.1975	97.818	40.7522	mid	0.569	0.554825	安徽	安徽	ānhuī	#NAME?
3400002020	340000	2020	0.20407	0.0799301	8.18	0.325095	0.159381	1.00384	0.0584579	48.1425	0.124753	6.23448	16.2994	117.401	35.0663	mid	0.583	0.591025	安徽	安徽	ānhuī	#NAME?
3500002010	350000	2010	0.139021	0.0801934	1.65	0.282016	0.376446	0.959193	0.0643965	73.1573	0.0318386	4.06242	18.0896	164.14	28.9126	east	0.571	0.556689	福建	福建	fújiàn	#NAME?
3500002012	350000	2012	0.264676	0.0807597	0.34	0.233007	0.350183	0.991588	0.0462295	71.0128	0.0484223	5.25663	17.906	162.577	32.4542	east	0.593	0.579211	福建	福建	fújiàn	#NAME?
3500002014	350000	2014	0.231783	0.0802644	0.77	0.198476	0.395263	1.06165	0.0554439	71.052	0.0740532	6.32246	18.357	126.738	31.5773	east	0.62	0.600822	福建	福建	fújiàn	#NAME?
3500002016	350000	2016	0.243942	0.0855438	2.05	0.151492	0.399448	1.00385	0.0613576	68.8645	0.0940189	7.37286	18.5458	162.367	25.5926	east	0.644	0.618711	福建	福建	fújiàn	#NAME?
3500002018	350000	2018	0.23398	0.0848225	6.1	0.094814	0.440345	1.05986	0.0671919	67.2271	0.107627	9.42685	18.5972	129.593	23.3704	east	0.67	0.640744	福建	福建	fújiàn	#NAME?
3500002020	350000	2020	0.228008	0.0514959	8.69	0.0648739	0.432463	1.04948	0.0429647	67.5439	0.125441	10.4803	18.9679	124.894	19.3369	east	0.687	0.668067	福建	福建	fújiàn	#NAME?
3600002010	360000	2010	0.115171	0.0522876	8.96	0.316063	0.328084	1.01917	0.0433421	76.3514	0.0336217	2.10291	17.953	169.862	39.0612	mid	0.441	0.474955	江西	江西	jiāngxī	#NAME?
3600002012	360000	2012	0.248191	0.0609412	7.14	0.317919	0.307758	1.0173	0.0373962	88.2883	0.0489721	2.86206	17.4393	172.886	43.95	mid	0.474	0.510336	江西	江西	jiāngxī	#NAME?
3600002014	360000	2014	0.249325	0.0685865	6.69	0.315119	0.281405	1.04876	0.0338281	86.7701	0.0755469	3.49728	18.2737	125.731	42.8608	mid	0.505	0.536173	江西	江西	jiāngxī	#NAME?
3600002016	360000	2016	0.239848	0.084457	6.97	0.32541	0.260073	1.03448	0.0483399	85.1246	0.0975801	4.08999	18.3719	165.102	34.504	mid	0.54	0.563264	江西	江西	jiāngxī	#NAME?
3600002018	360000	2018	0.236275	0.0827786	9.91	0.341981	0.227326	1.00774	0.0412782	80.9772	0.12973	5.03357	18.3849	132.936	29.1743	mid	0.573	0.589927	江西	江西	jiāngxī	#NAME?
3600002020	360000	2020	0.227174	0.0579153	10.39	0.36628	0.220009	1.02105	0.0272025	81.2481	0.142146	5.70524	18.5585	139.901	24.5637	mid	0.604	0.619964	江西	江西	jiāngxī	#NAME?
3700002010	370000	2010	0.119599	0.0578724	8.58	0.0649672	0.107717	0.987589	0.0706282	69.8446	0.0261546	3.53802	13.1888	58.0782	63.1096	east	0.497	0.429431	山东	山东	shāndōng	#NAME?
3700002012	370000	2012	0.247196	0.0379003	8.4	0.0800567	0.110624	0.996524	0.0620333	70.9106	0.043563	4.42494	13.1552	57.1244	64.0244	east	0.523	0.4498	山东	山东	shāndōng	#NAME?
3700002014	370000	2014	0.226729	0.0574016	8.91	0.111629	0.147822	0.996215	0.0553539	78.5196	0.0617527	5.17688	14.182	50.8602	60.8606	east	0.549	0.555031	山东	山东	shāndōng	#NAME?
3700002016	370000	2016	0.239543	0.0536071	8.7	0.106765	0.160572	1.00518	0.0655896	77.2055	0.0792329	5.89216	14.1988	60.4885	61.6536	east	0.589	0.59435	山东	山东	shāndōng	#NAME?
3700002018	370000	2018	0.22869	0.0670826	9.26	0.109814	0.173948	0.979608	0.0704052	80.8475	0.0878386	6.61396	14.199	65.0702	47.5704	east	0.61	0.618213	山东	山东	shāndōng	#NAME?
3700002020	370000	2020	0.222665	0.0619973	10.72	0.165829	0.162757	0.994684	0.0540058	83.4943	0.102853	7.16165	14.0578	70.4506	44.3734	east	0.631	0.633519	山东	山东	shāndōng	#NAME?
4100002010	410000	2010	0.123708	0.083316	14.21	0.12647	0.255247	0.992694	0.0615843	80.5327	0.0287305	2.40883	14.7679	66.67	65.2968	mid	0.388	0.3945	河南	河南	hénán	#NAME?
4100002012	410000	2012	0.236679	0.0564714	9.03	0.124089	0.24386	0.964958	0.0536293	72.6584	0.0446905	3.03839	14.7202	51.8362	67.8899	mid	0.42	0.430659	河南	河南	hénán	#NAME?
4100002014	410000	2014	0.217449	0.0719202	7.54	0.138303	0.229583	0.969361	0.0454235	73.7729	0.0625143	3.58474	15.1607	62.7935	61.6219	mid	0.45	0.458729	河南	河南	hénán	#NAME?
4100002016	410000	2016	0.231263	0.0750468	6.59	0.167336	0.219427	0.986233	0.0564902	72.8891	0.0795674	4.11631	15.4399	75.6846	57.2189	mid	0.488	0.491247	河南	河南	hénán	#NAME?
4100002018	410000	2018	0.230895	0.0762603	6.39	0.194834	0.203774	0.972979	0.0482897	72.3348	0.0941758	5.06244	15.1945	64.6437	49.7313	mid	0.522	0.523071	河南	河南	hénán	#NAME?
4100002020	410000	2020	0.221427	0.0730497	9.67	0.232003	0.2164	0.977348	0.0350493	75.087	0.109183	5.45814	15.3708	77.7868	43.4356	mid	0.554	0.548529	河南	河南	hénán	#NAME?
4200002010	420000	2010	0.123644	0.0688513	10.88	0.0778622	0.240655	1.02472	0.068505	59.8272	0.0312727	2.83291	15.3198	106.211	53.2977	mid	0.497	0.45085	湖北	湖北	húběi	#NAME?
4200002012	420000	2012	0.249036	0.0549889	5.56	0.0203616	0.219797	1.01616	0.0586801	60.9583	0.046357	3.90778	14.9618	91.6352	53.7083	mid	0.532	0.479892	湖北	湖北	húběi	#NAME?
4200002014	420000	2014	0.23774	0.100157	1.61	0.0361487	0.197937	1.00822	0.0580228	62.0306	0.0690028	4.85593	15.3858	99.7425	51.8194	mid	0.557	0.544775	湖北	湖北	húběi	#NAME?
4200002016	420000	2016	0.226244	0.0926078	1.21	0.0892762	0.182877	1.03575	0.0563502	61.774	0.100068	5.66746	15.8665	110.601	42.3984	mid	0.586	0.572317	湖北	湖北	húběi	#NAME?
4200002018	420000	2018	0.222031	0.0809408	2.43	0.130088	0.172904	1.03661	0.0481317	61.663	0.0973027	7.10191	15.7076	92.052	36.1496	mid	0.61	0.593908	湖北	湖北	húběi	#NAME?
4200002020	420000	2020	0.213562	0.0874755	4.9	0.197922	0.222977	1.01844	0.0343188	61.7006	0.177495	7.48555	15.4988	123.943	30.7156	mid	0.632	0.612067	湖北	湖北	húběi	#NAME?
4300002010	430000	2010	0.110239	0.0832816	6.66	0.0541892	0.334117	1.02036	0.0464309	90.3486	0.0274642	2.37052	16.9307	129.327	47.0604	mid	0.433	0.430531	湖南	湖南	húnán	#NAME?
4300002012	430000	2012	0.222003	0.0618437	1.91	0.007394	0.323431	1.03096	0.0403861	88.9408	0.0446388	3.21809	16.3227	131.452	53.8796	mid	0.462	0.465654	湖南	湖南	húnán	#NAME?
4300002014	430000	2014	0.212083	0.0925531	0.75	0.0533574	0.307973	1.01464	0.0331323	93.1342	0.0638935	3.91488	17.1473	113.537	51.6223	mid	0.49	0.491692	湖南	湖南	húnán	#NAME?
4300002016	430000	2016	0.210301	0.094707	0.88	0.112005	0.280628	1.02056	0.0338744	92.1585	0.0824558	4.65713	17.2771	134.364	39.709	mid	0.527	0.525085	湖南	湖南	húnán	#NAME?
4300002018	430000	2018	0.208906	0.0777607	1.19	0.171039	0.236825	0.981493	0.0311848	84.7611	0.0945139	5.47546	17.1713	115.629	32.7212	mid	0.561	0.554792	湖南	湖南	húnán	#NAME?
4300002020	430000	2020	0.193801	0.0727402	4.39	0.215909	0.136957	1.01914	0.024421	84.3371	0.111004	6.25171	17.0618	129.889	28.7002	mid	0.588	0.571438	湖南	湖南	húnán	#NAME?
4400002010	440000	2010	0.110905	0.0571538	4.12	0.60338	0.489452	1.05301	0.0332937	42.9844	0.0291198	4.4004	20.8149	150.644	35.2708	east	0.662	0.609371	广东	广东	guǎngdōng	#NAME?
4400002012	440000	2012	0.237312	0.0565961	0.29	0.714933	0.419707	1.09657	0.0278796	42.1465	0.0457513	5.16327	20.6764	148.85	41.2109	east	0.671	0.618195	广东	广东	guǎngdōng	#NAME?
4400002014	440000	2014	0.223849	0.0500676	0.49	0.823754	0.360849	1.18045	0.0307334	41.8531	0.0676778	5.93376	21.0496	137.511	37.3395	east	0.686	0.625424	广东	广东	guǎngdōng	#NAME?
4400002016	440000	2016	0.21501	0.0584916	3.23	0.853212	0.302955	1.11003	0.0287395	41.2151	0.0942081	6.89983	21.0156	180.104	29.498	east	0.701	0.63571	广东	广东	guǎngdōng	#NAME?
4400002018	440000	2018	0.218915	0.0589573	7.27	0.799921	0.252413	1.16352	0.0267162	41.6675	0.113987	8.09404	21.072	149.948	28.2111	east	0.718	0.647529	广东	广东	guǎngdōng	#NAME?
4400002020	440000	2020	0.204281	0.0489103	11.21	0.706373	0.19512	1.13422	0.0232959	44.2807	0.140446	8.80478	21.5571	135.487	21.519	east	0.742	0.67189	广东	广东	guǎngdōng	#NAME?
4500002010	450000	2010	0.127648	0.0460995	10.73	0.107248	0.380188	1.0772	0.0458463	71.0217	0.035898	1.85518	19.8335	121.645	39.029	west	0.4	0.392136	广西	广西	guǎngxī	#NAME?
4500002012	450000	2012	0.24276	0.037615	4.94	0.154119	0.39059	1.04864	0.0374975	72.7567	0.0539348	2.4081	19.3466	132.235	46.026	west	0.435	0.426857	广西	广西	guǎngxī	#NAME?
4500002014	450000	2014	0.256364	0.0530955	2.68	0.184499	0.383989	1.05458	0.0359637	72.6771	0.0744927	2.8486	19.7388	127.781	43.4559	west	0.465	0.451657	广西	广西	guǎngxī	#NAME?
4500002016	450000	2016	0.2537	0.0673804	1.21	0.231493	0.335102	1.0573	0.0378857	70.523	0.0963928	3.31822	20.094	141.211	32.661	west	0.492	0.472679	广西	广西	guǎngxī	#NAME?
4500002018	450000	2018	0.242021	0.0725233	1.9	0.287751	0.333709	1.06801	0.0317762	68.207	0.110475	3.96762	19.7269	132.54	30.198	west	0.518	0.484929	广西	广西	guǎngxī	#NAME?
4500002020	450000	2020	0.23883	0.0579546	4.6	0.325429	0.348382	1.05165	0.0278681	67.4935	0.124495	4.40743	19.9738	119.036	24.5826	west	0.542	0.528321	广西	广西	guǎngxī	#NAME?
4600002010	460000	2010	0.519303	0.378437	8.82	0.0983483	0.0734705	1.08006	0.063205	53.832	0.040069	2.32509	24.3738	124.246	19.1779	east	0.498	0.6325	海南	海南	hǎinán	#NAME?
4600002012	460000	2012	0.421956	0.307496	2.67	0.200433	0.110798	1.10814	0.0444444	56.6374	0.0657802	3.06527	24.1132	166.742	20.4478	east	0.502	0.719	海南	海南	hǎinán	#NAME?
4600002014	460000	2014	0.342857	0.249854	1.47	0.272526	0.145504	1.13623	0.0442273	54.2201	0.0945085	3.68483	23.8292	133.95	22.1518	east	0.519	0.641933	海南	海南	hǎinán	#NAME?
4600002016	460000	2016	0.278586	0.203017	1.15	0.310988	0.163431	1.09424	0.0462933	53.7513	0.1193	4.27398	24.1907	145.436	19.9648	east	0.544	0.683433	海南	海南	hǎinán	#NAME?
4600002018	460000	2018	0.136574	0.059527	1.71	0.329528	0.211411	1.00811	0.0397479	54.2261	0.147108	5.00071	23.9341	115.182	17.36	east	0.562	0.6995	海南	海南	hǎinán	#NAME?
4600002020	460000	2020	0.181818	0.045934	2.61	0.285674	0.240673	1.07916	0.0403999	60.5435	0.21748	5.5002	24.6216	128.279	13.8492	east	0.603	0.687067	海南	海南	hǎinán	#NAME?
5000002010	500000	2010	0.122694	0.0420447	8.13	0.0729136	0.118783	0.999904	0.0604705	60.6412	0.0328839	2.7956	15.3786	101.085	50.6769	west	0.53	0.5302	重庆	重庆	chóngqìng	#NAME?
5000002012	500000	2012	0.257526	0.0516381	4.05	0.0145072	0.0808228	0.98867	0.0526854	60.3731	0.056279	3.89761	14.8579	99.6556	51.8524	west	0.567	0.5698	重庆	重庆	chóngqìng	#NAME?
5000002014	500000	2014	0.264057	0.1226	2.31	0.0282208	0.0384823	1.04257	0.051195	61.6727	0.080953	4.80572	15.3207	115.625	45.5411	west	0.598	0.5961	重庆	重庆	chóngqìng	#NAME?
5000002016	500000	2016	0.25102	0.0738582	2.67	0.0468746	1.06e-05	1.00864	0.040211	64.0932	0.106489	5.79518	15.8703	115.275	39.3434	west	0.633	0.626	重庆	重庆	chóngqìng	#NAME?
5000002018	500000	2018	0.221122	0.0868915	3.94	0.0158373	0.0037851	0.981697	0.0382703	64.8878	0.11786	6.82542	15.6118	103.647	31.4814	west	0.665	0.655	重庆	重庆	chóngqìng	#NAME?
5000002020	500000	2020	0.224029	0.0706944	5.23	0.0026943	0.0226931	0.997718	0.0215813	65.1979	0.135385	7.80349	15.4478	113.727	27.1768	west	0.695	0.6946	重庆	重庆	chóngqìng	#NAME?
5100002010	510000	2010	0.108141	0.0536586	6.7	0.0542818	0.391015	1.0073	0.0821177	92.3344	0.0327334	2.14106	6.72171	72.9057	30.3606	west	0.402	0.3907	四川	四川	sìchuān	#NAME?
5100002012	510000	2012	0.221842	0.0337907	2.72	0.0134703	0.350109	1.09863	0.0684866	94.6902	0.052475	2.95886	6.42782	74.1405	29.0147	west	0.435	0.424256	四川	四川	sìchuān	#NAME?
5100002014	510000	2014	0.242078	0.0767578	0.59	0.0066263	0.338294	0.967388	0.0718486	99.6068	0.0717656	3.54974	6.80795	75.5657	25.8381	west	0.463	0.450711	四川	四川	sìchuān	#NAME?
5100002016	510000	2016	0.230289	0.0684764	0.08	0.008977	0.340805	0.978477	0.0822155	96.3677	0.0935935	4.0163	7.19453	74.9691	23.4589	west	0.493	0.475533	四川	四川	sìchuān	#NAME?
5100002018	510000	2018	0.222749	0.0651012	1.03	0.0208198	0.335951	0.963485	0.0749138	97.9894	0.105863	5.15588	6.63612	76.5685	19.9274	west	0.524	0.503961	四川	四川	sìchuān	#NAME?
5100002020	510000	2020	0.205273	0.0504153	3.97	0.0374174	0.349409	0.981796	0.0549593	98.9046	0.123106	5.794	7.23606	77.6352	17.3462	west	0.567	0.538372	四川	四川	sìchuān	#NAME?
5200002010	520000	2010	0.135874	0.0285468	26.44	0.112271	0.719259	1.0687	0.127574	73.067	0.0367002	1.29894	14.769	94.459	36.4947	west	0.338	0.3553	贵州	贵州	guìzhōu	#NAME?
5200002012	520000	2012	0.245332	0.0447606	17.39	0.169898	0.605899	1.02468	0.119636	76.3981	0.0560496	1.87962	14.0955	91.9714	41.9126	west	0.363	0.3854	贵州	贵州	guìzhōu	#NAME?
5200002014	520000	2014	0.248781	0.0445697	7.23	0.238563	0.599061	1.01061	0.111116	78.855	0.0824721	2.49472	14.7891	110.984	39.7906	west	0.402	0.432075	贵州	贵州	guìzhōu	#NAME?
5200002016	520000	2016	0.251097	0.0473235	5	0.309188	0.566599	1.03893	0.118613	74.553	0.104447	3.13795	15.1779	104.865	32.4033	west	0.456	0.47705	贵州	贵州	guìzhōu	#NAME?
5200002018	520000	2018	0.227168	0.0384742	2.91	0.377196	0.55369	1.06344	0.0992629	73.4328	0.12606	4.01706	14.7966	103.17	26.7251	west	0.495	0.528175	贵州	贵州	guìzhōu	#NAME?
5200002020	520000	2020	0.217616	0.0481808	5.43	0.405233	0.552732	1.02885	0.0842299	74.8574	0.14662	4.62945	14.8192	107.372	22.2918	west	0.532	0.545	贵州	贵州	guìzhōu	#NAME?
5300002010	530000	2010	0.141853	0.0753481	17.52	0.212131	0.498947	1.04978	0.112237	49.7349	0.0399174	1.68086	15.4922	86.4542	27.7813	west	0.348	0.332637	云南	云南	yúnnán	#NAME?
5300002012	530000	2012	0.259945	0.0449492	11.63	0.188593	0.481825	1.04935	0.0834	50.5182	0.057642	2.39633	15.1209	78.3445	28.2063	west	0.385	0.377588	云南	云南	yúnnán	#NAME?
5300002014	530000	2014	0.233677	0.0669335	5.81	0.203982	0.468467	1.03926	0.0823421	52.1835	0.0757382	3.01777	15.2786	82.9269	28.7515	west	0.412	0.401675	云南	云南	yúnnán	#NAME?
5300002016	530000	2016	0.246782	0.070202	3.44	0.243878	0.459145	1.01428	0.0883254	51.8153	0.0998461	3.49989	15.0297	109.338	24.7591	west	0.446	0.4349	云南	云南	yúnnán	#NAME?
5300002018	530000	2018	0.247301	0.056187	2.5	0.294865	0.43301	1.06508	0.0813803	53.0597	0.122352	4.43985	14.8553	99.9729	22.6613	west	0.474	0.462987	云南	云南	yúnnán	#NAME?
5300002020	530000	2020	0.236291	0.0565579	1.93	0.334729	0.430532	1.04583	0.05967	56.3871	0.150644	5.20028	15.296	83.9159	21.6335	west	0.5	0.475562	云南	云南	yúnnán	#NAME?
5400002010	540000	2010	0.329668	0.436711	38.52	0.374807	0.449874	0.990157	0.346192	165.333	0.1068	1.70967	-2.72472	32.3521	5.14055	west	0.226	0.226	西藏	西藏	xīzàng	#NAME?
5400002012	540000	2012	0.285149	0.256889	22.63	0.340731	0.450148	0.966568	0.348	211.429	0.114667	2.2546	-3.94766	30.2983	6.08022	west	0.228	0.228	西藏	西藏	xīzàng	#NAME?
5400002014	540000	2014	0.246641	0.151111	11.62	0.34536	0.423617	1.01119	0.39909	209.077	0.150338	2.89138	-3.53441	29.2923	5.82315	west	0.262	0.262	西藏	西藏	xīzàng	#NAME?
5400002016	540000	2016	0.213333	0.0888888	9.03	0.382264	0.423672	1.03164	0.411043	201.029	0.205794	3.45	-2.12416	30.6916	5.83624	west	0.316	0.316	西藏	西藏	xīzàng	#NAME?
5400002018	540000	2018	0.184524	0.0522875	8.36	0.442671	0.40517	0.965328	0.352368	193.333	0.302062	4.37401	-3.14352	31.46	5.26746	west	0.338	0.338	西藏	西藏	xīzàng	#NAME?
5400002020	540000	2020	0.18125	0.0888888	4.47	0.441711	0.403395	1.05745	0.33792	189.59	0.394454	5.19863	-3.01794	30.8602	4.41807	west	0.357	0.36812	西藏	西藏	xīzàng	#NAME?
6100002010	610000	2010	0.111142	0.0812564	16.8	0.291011	0.278195	1.01089	0.0621253	95.5716	0.0419438	2.63593	10.8637	56.4796	41.7954	west	0.457	0.40341	陕西	陕西	shǎnxī	#NAME?
6100002012	610000	2012	0.224097	0.0642437	12.22	0.32039	0.244815	1.05208	0.0461859	95.7777	0.0587008	3.73446	10.3777	50.9959	42.5763	west	0.497	0.46854	陕西	陕西	shǎnxī	#NAME?
6100002014	610000	2014	0.202506	0.0804088	10.23	0.349241	0.218743	1.05178	0.056882	97.3269	0.0819049	4.5473	11.0912	57.7205	38.6325	west	0.53	0.51391	陕西	陕西	shǎnxī	#NAME?
6100002016	610000	2016	0.216362	0.0827879	3.61	0.37172	0.223993	1.0039	0.0521915	94.4708	0.0985183	4.91631	11.5061	48.5688	35.6399	west	0.564	0.53149	陕西	陕西	shǎnxī	#NAME?
6100002018	610000	2018	0.214031	0.0868201	4.41	0.399251	0.211656	0.994779	0.0495779	89.799	0.115825	6.09054	11.1679	51.3382	32.0319	west	0.597	0.55566	陕西	陕西	shǎnxī	#NAME?
6100002020	610000	2020	0.204911	0.0821426	6.83	0.424259	0.238833	1.02322	0.036351	88.4526	0.128741	6.57752	11.0068	57.2619	28.0829	west	0.627	0.57654	陕西	陕西	shǎnxī	#NAME?
6200002010	620000	2010	0.140759	0.0867463	31.23	0.0902567	0.490974	1.03035	0.129154	104.191	0.0392188	1.54051	5.85253	26.1265	35.0734	west	0.361	0.423325	甘肃	甘肃	gānsù	#NAME?
6200002012	620000	2012	0.245421	0.0660425	24.19	0.165009	0.458238	1.04454	0.0868669	103.533	0.0581216	2.11494	5.10368	27.2136	33.1832	west	0.388	0.447333	甘肃	甘肃	gānsù	#NAME?
6200002014	620000	2014	0.23215	0.085675	10.2	0.242259	0.437829	1.05635	0.0864557	110.296	0.0806756	2.57542	5.73637	26.402	36.0246	west	0.423	0.475058	甘肃	甘肃	gānsù	#NAME?
6200002016	620000	2016	0.233924	0.0852537	8.2	0.292768	0.434839	1.00198	0.0870257	111.893	0.108433	2.74123	6.44379	24.2646	32.8789	west	0.461	0.503783	甘肃	甘肃	gānsù	#NAME?
6200002018	620000	2018	0.237612	0.0927073	5.57	0.213717	0.457745	1.01562	0.103526	110.922	0.124664	3.22231	5.91613	29.1785	31.4098	west	0.497	0.531517	甘肃	甘肃	gānsù	#NAME?
6200002020	620000	2020	0.225675	0.0764952	5.49	0.115371	0.466097	1.01531	0.0972208	104.774	0.148037	3.59044	6.09221	24.5663	27.2625	west	0.522	0.563125	甘肃	甘肃	gānsù	#NAME?
6300002010	630000	2010	1.62612	0.614577	14.32	0.272859	0.346721	0.997424	0.126902	102.682	0.0691652	2.03233	-2.56615	30.9327	12.9867	west	0.447	0.43265	青海	青海	qīnghǎi	#NAME?
6300002012	630000	2012	0.879348	0.355597	4.84	0.339031	0.327015	1.04968	0.122497	104.168	0.105271	2.67688	-4.0224	33.0038	11.2842	west	0.476	0.46785	青海	青海	qīnghǎi	#NAME?
6300002014	630000	2014	0.475519	0.20575	2.22	0.400911	0.318937	0.997461	0.131198	108.351	0.139115	3.20781	-3.27996	30.7128	13.4884	west	0.504	0.48815	青海	青海	qīnghǎi	#NAME?
6300002016	630000	2016	0.257143	0.119048	2.09	0.44201	0.330313	1.06553	0.134399	108.093	0.177079	3.88007	-2.39963	26.5324	12.0126	west	0.526	0.5117	青海	青海	qīnghǎi	#NAME?
6300002018	630000	2018	0.139053	0.0688813	0.86	0.473323	0.340748	1.07512	0.102313	108.961	0.241227	4.68143	-3.25541	33.2562	12.1906	west	0.56	0.543	青海	青海	qīnghǎi	#NAME?
6300002020	630000	2020	0.185096	0.039855	1.33	0.482559	0.254323	1.02952	0.0977273	108.044	0.290202	5.07555	-2.22837	27.7149	9.80867	west	0.6	0.59515	青海	青海	qīnghǎi	#NAME?
6400002010	640000	2010	0.979592	0.3	10.12	0.460669	0.33806	1.06101	0.0913506	65.2291	0.0537441	2.48294	8.80706	25.4702	43.2077	west	0.48	0.47245	宁夏	宁夏	níngxià	#NAME?
6400002012	640000	2012	0.380952	0.2	7.65	0.477439	0.328188	1.01614	0.074894	62.8225	0.0699393	3.23369	8.22622	28.509	39.471	west	0.511	0.51145	宁夏	宁夏	níngxià	#NAME?
6400002014	640000	2014	0.148148	0.133333	8.31	0.515614	0.319925	1.03766	0.0805384	62.7581	0.0962684	3.64882	8.90608	29.0559	37.4811	west	0.548	0.523	宁夏	宁夏	níngxià	#NAME?
6400002016	640000	2016	0.231292	0.0888888	8.26	0.533776	0.315191	1.04875	0.0681074	61.2086	0.118029	4.00201	9.33528	27.2677	37.7749	west	0.587	0.54345	宁夏	宁夏	níngxià	#NAME?
6400002018	640000	2018	0.151455	0.100334	10.87	0.509994	0.317582	0.953619	0.0923009	62.6761	0.148662	4.94394	9.02784	31.8161	33.4355	west	0.622	0.56088	宁夏	宁夏	níngxià	#NAME?
6400002020	640000	2020	0.153674	0.0302419	14.78	0.447067	0.327268	1.03673	0.0648503	63.4397	0.164452	5.48724	9.0172	26.7551	28.1832	west	0.649	0.6144	宁夏	宁夏	níngxià	#NAME?
6500002010	650000	2010	0.0814012	0.0936394	20.22	0.432397	0.12176	1.04226	0.0349278	73.2265	0.0473959	2.45318	5.89189	10.6837	47.8253	west	0.429	0.429	新疆	新疆	xīnjiāng	#NAME?
6500002012	650000	2012	0.125	0.0724049	10.18	0.465408	0.124063	1.03629	0.034229	81.3138	0.0647492	3.28975	5.31411	9.20955	46.2103	west	0.442	0.442	新疆	新疆	xīnjiāng	#NAME?
6500002014	650000	2014	0.19195	0.0559858	8.5	0.501486	0.100711	1.03857	0.0324888	81.1742	0.0870194	3.98473	5.47125	8.10628	48.4303	west	0.468	0.468	新疆	新疆	xīnjiāng	#NAME?
6500002016	650000	2016	0.215478	0.04329	0.88	0.51793	0.132358	1.02935	0.0378264	77.5329	0.105614	3.96656	6.59779	12.3848	47.8434	west	0.504	0.504	新疆	新疆	xīnjiāng	#NAME?
6500002018	650000	2018	0.182277	0.0334732	1.15	0.512953	0.146374	0.976803	0.0367904	73.2143	0.113548	5.0831	5.75794	9.73861	46.211	west	0.54	0.54	新疆	新疆	xīnjiāng	#NAME?
6500002020	650000	2020	0.202986	0.0546491	7.75	0.481127	0.182671	1.04242	0.0356593	70.1081	0.182108	5.32846	6.09321	8.30334	42.0168	west	0.565	0.565	新疆	新疆	xīnjiāng	#NAME?
